# Supplementary material for: Advanced nanocomposite materials made of TiC nanocrystals in situ immobilized in SiC foams with boosted spectral selectivity
Source: Royal Society of Chemistry journal article supplement (doi:10.1039/d2ma00886f), 2023-01-01
Supplement: d2ma00886f1.pdf [file d2ma00886f1.pdf]

## ESI

### Figures

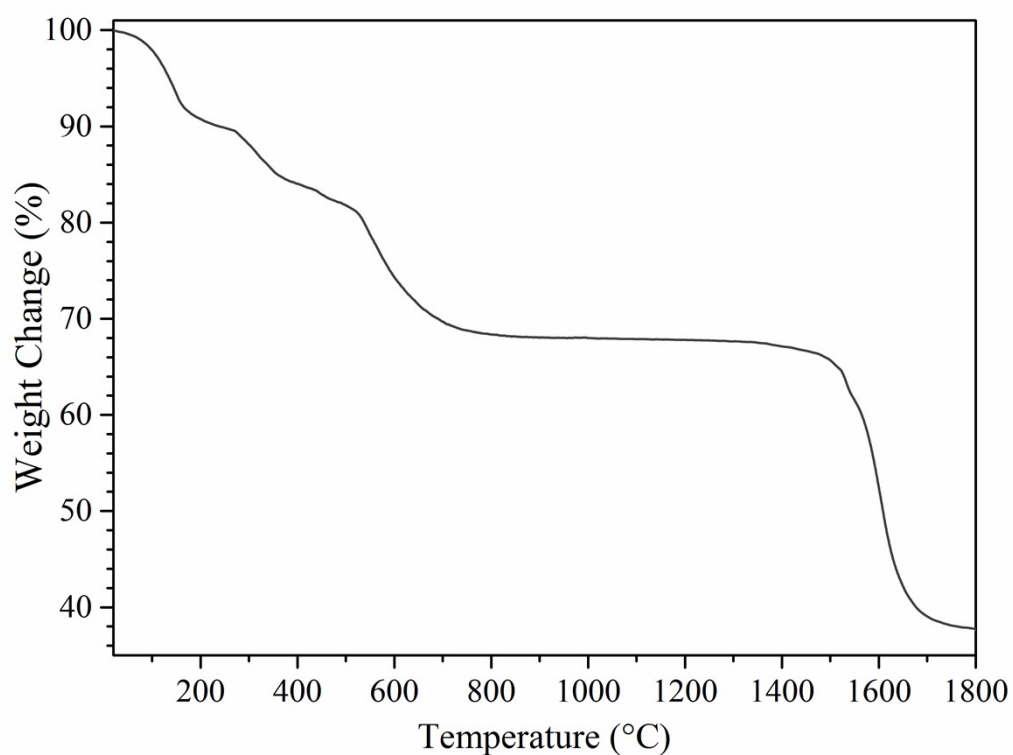

**Figure 1SI.** TG curves of PSZ recorded in flowing argon upon pyrolysis to 1800 °C.

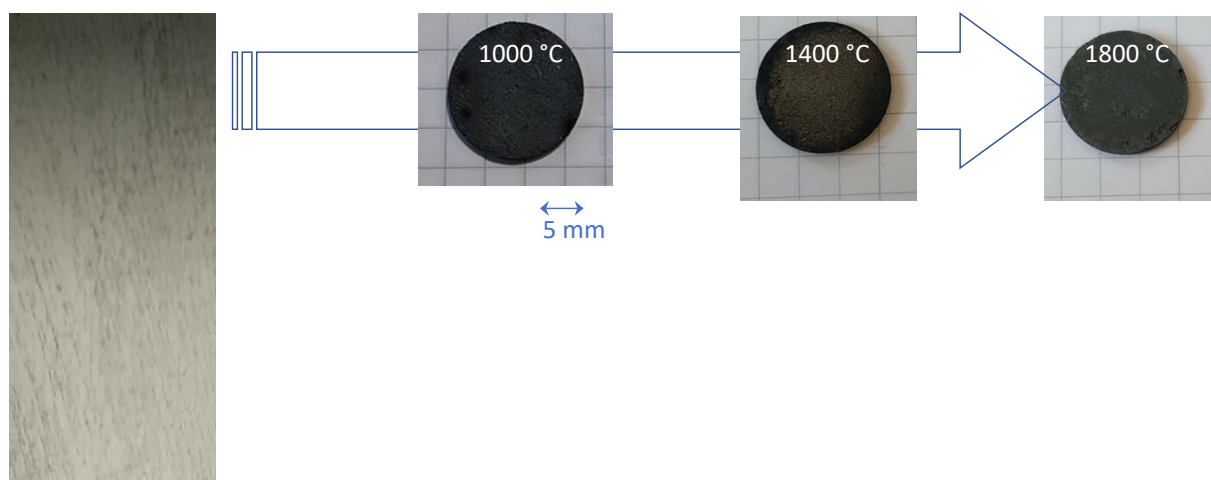

**Figure 2SI.** Illustrations of the **PSZTi5**-derived pellets isolated at different temperatures in flowing argon upon heat-treatment to 1800 °C.

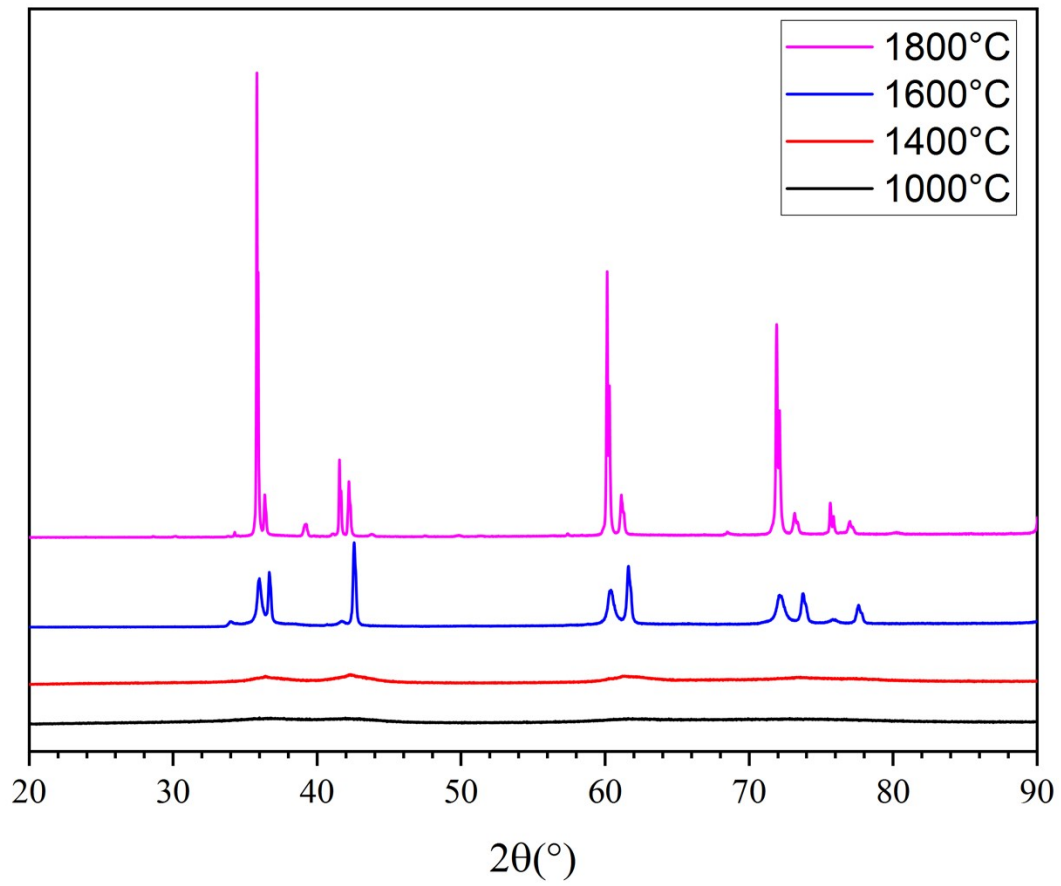

**Figure 3SI.** XRD patterns of PSZTi<sub>5</sub>\_X foams with X = 10, 14, 16 and 18.
